## **Black Women and the Premie Prep for Parents (P3) Program: Exploratory Analysis of a Clinical Trial**

Siobhan M McDonnell, MS<sup>a</sup>, Kathryn E Flynn, PhD<sup>b</sup>, Kris Barnekow, PhD<sup>c</sup>, U. Olivia Kim, MD<sup>d</sup>, Ruta Brazauskas, PhD<sup>e</sup>, S. Iqbal Ahamed PhD<sup>f</sup>, Jennifer J McIntosh, DO, MS<sup>g</sup>, Michael B Pitt, MD, Steven R Leuthner, MD, MA<sup>a</sup>, Abbey Kruper, PsyD<sup>g</sup>, Mir A Basir, MD, MS<sup>a</sup>

### **Author Affiliations:**

<sup>a</sup>Department of Pediatrics, Medical College of Wisconsin, Milwaukee, USA

<sup>b</sup>Department of Medicine, Medical College of Wisconsin, Milwaukee, USA

<sup>c</sup>Families First LLC, Eagle River, WI, USA

<sup>d</sup>Department of Pediatrics, Northwestern University Feinberg School of Medicine, Chicago, USA

<sup>e</sup>Division of Biostatistics, Medical College of Wisconsin, Milwaukee, USA

<sup>f</sup>Department of Computer Science, Marquette University, Milwaukee, USA

<sup>g</sup>Department of Obstetrics & Gynecology, Medical College of Wisconsin, Milwaukee, USA

<sup>h</sup>Department of Pediatrics, University of Minnesota Masonic Children's Hospital, Minneapolis, USA

**Corresponding author at:** Mir A. Basir, Department of Pediatrics, Medical College of Wisconsin, 999 N 92<sup>nd</sup> St, Milwaukee, WI 53226, 414-266-6820, 414-266-6979, [mbasir@mcw.edu](mailto:mbasir@mcw.edu)

**Conflict of Interest Disclosures (includes financial disclosures):** The authors have no conflicts of interest to disclose.

**Funding/Support:** This work was supported by the National Institutes of Health Eunice Kennedy Shriver National Institute of Child Health and Human Development (NICHD) [grant number R21 HD092664]. The NICHD had no role in the design and conduct of this study.

**Clinical Trial Registration:** ClinicalTrials.gov, NCT04093492, <https://clinicaltrials.gov/study/NCT04093492>

**Abbreviations:** Eunice Kennedy Shriver National Institute of Child Health and Human Development (NICHD); gestational age (GA); Premie Prep for Parents (P3); randomized controlled trial (RCT); Patient-Reported Outcomes Measurement Information System (PROMIS); Research Electronic Data Capture (REDCap)

## **Abstract**

**Background:** The smartphone Preemie Prep for Parents (P3) program was developed to address the gap in prenatal education of preterm birth in high-risk pregnancies. Despite a higher incidence of preterm birth, Black women are less likely to receive prenatal education.

**Methods:** Pregnant women with medical conditions that predisposed them to preterm birth were randomized to receive the P3 program or links to American College of Obstetricians and Gynecologists webpages (control). The P3 group received periodic text messages, starting as early as 18 weeks gestational age, each with a link to a short, animated educational video. Participants completed the Parent Prematurity Knowledge Questionnaire, PROMIS Anxiety scale, and a feedback survey. This is a subgroup analysis of the Black, non-Hispanic participants in the P3 trial.

**Results:** Of the 26 Black non-Hispanic women enrolled, the P3 group (n=14) had higher knowledge scores than the control group (n=12), 67.5% correct vs. 43.6% (difference 24.0; 95% CI, 7.4 to 40.6), without experiencing an increase in anxiety. More P3 participants reported discussing preterm birth with their partner (100%) than control participants (57%; difference 43; 95% CI, 6 to 80).

**Conclusions:** The P3 program appears to be an effective method of providing preterm birth education to Black pregnant women.

**1. Introduction:** Preterm birth is the leading cause of US infant mortality and childhood morbidity.<sup>1</sup> Preterm birth education is typically not provided to pregnant women until the delivery hospitalization.<sup>2</sup> Waiting until the end of the pregnancy to provide education misses the opportunity to empower patients to make truly informed healthcare decisions.<sup>3</sup> To address this gap, we developed the smartphone Preemie Prep for Parents (P3) program and tested it in a randomized controlled trial (RCT), showing greater preterm birth knowledge and preparedness to make key medical decisions throughout pregnancy.<sup>4</sup> Despite a 50% higher incidence of preterm birth,<sup>5</sup> Black women are less likely than other US women to receive prenatal education.<sup>6</sup> While certain mobile health (mHealth) interventions have been explored in Black pregnant women, none directly address the preterm birth risks.<sup>7-9</sup> Herein we examine the effect of the P3 program on preterm birth knowledge and preparation among Black pregnant women to make preterm birth healthcare choices.

**2. Methods:** This is an exploratory post-hoc subgroup analysis of a RCT (NCT04093492) approved by an institutional review board. Pregnant women with medical conditions that predisposed them to preterm birth (history of preeclampsia, chronic hypertension, diabetes requiring medications, intrauterine growth restriction, short cervix, multifetal gestation, and history of preterm birth) were recruited by phone from a high-risk obstetric clinic and randomized 1:1 to P3 or the control group. The randomization sequence was generated in R and implemented through Research Electronic Data Capture (REDCap).<sup>10</sup> The P3 group received periodic text messages, starting as early as 18 weeks gestational age (GA) and continuing until preterm birth or 34 weeks GA. Each P3 text message had a link to 1 of 51 short, animated educational videos. The control group received links at the time of enrollment to American College of Obstetricians and Gynecologists patient education

webpages. Study assessments at 25-, 30-, and 34-weeks GA included the Parent Prematurity Knowledge Questionnaire (PPKQ),<sup>4</sup> a measure of core knowledge needed to participate in decisions about preterm birth. The PPKQ was refined through multiple rounds of cognitive interviews featuring diverse patient samples,<sup>11, 12</sup> and is scored out of 100 percentage points. At each follow up, the Preparation for Decision Making Scale<sup>13</sup> was administered, a 10-item measure of how well a decision aid prepared someone to communicate with clinicians about a health care decision. The scale is customized to a specific decision; we assessed the decision for neonatal resuscitation at 25 weeks GA, a risk appropriate birth hospital at 30 weeks GA, and breastfeeding choice at 34 weeks GA. The scale has been shown to discriminate between patients who did and patients who did not find a decision aid helpful, with a difference of 12 points on a 100-point scale and SD of 20.<sup>13</sup> To explore experiential differences and potential harms of the education, the PROMIS Anxiety computerized adaptive test<sup>14</sup> was collected at enrollment and each follow up assessment. The PROMIS Anxiety scale measures general anxiety over the past 7 days, with a population mean of  $50 \pm 10$ .

This post-hoc subgroup analysis examined responses from participants self-reporting as Black and not Hispanic or Latino. Hispanic or Latino participants were excluded from this analysis because of long-standing concerns of Hispanics being categorized by race,<sup>15</sup> including many Hispanics viewing the ethnic identity as their racial identity<sup>16</sup> and the demographic differences.<sup>17</sup> Comparisons used t-tests for continuous variables and chi-square tests for categorical variables.

- 3. Results:** Of the 122 Black non-Hispanic women contacted by phone, 61 responded and 26 (21%) enrolled (Table 1); this compares to a 35% enrollment rate in the overall sample.<sup>4</sup> The

Black women enrolled in the P3 group (n=14) had significantly higher PPKQ scores than the Black women in the control group (n=12) at 25 weeks GA (67.5% vs. 43.6%; difference 24.0 percentage points; 95% CI, 7.4 to 40.6 percentage points) and 30 weeks GA (76.5% vs. 52.9%; difference 23.5 percentage points; 95% CI, 6.9 to 40.1 percentage points), though this difference did not reach significance at 34 weeks GA (76.4% vs. 54.3%; difference 22.1 percentage points; 95% CI, -5.5 to 49.7 percentage points), Figure 1.

Preparation for Decision Making Scale scores were higher in the P3 group than the control group at 30 weeks for a birth hospital choice (89.1 vs. 65.0, difference 24.1; 95% CI, 4.0 to 44.1). However, the difference did not reach significance at 25 weeks for a neonatal resuscitation decision (81.9 vs. 64.2; difference 17.7; 95% CI, -10.1 to 45.6) and 34 weeks for a breastfeeding decision (74.6 vs. 58.5; difference 16.1; 95% CI, -18.8 to 51.1), Figure 2.

Anxiety was not higher in the Black women in the P3 group than in the control group at enrollment (mean 56.1 vs. 52.8; difference 3.3; 95% CI, -4.2 to 10.8), 25 weeks (52.9 vs. 50.6; difference 2.3; 95% CI, -7.2 to 11.8), 30 weeks (50.7 vs. 55.9; difference -5.2; 95% CI, -12.6 to 2.3), or 34 weeks (56.2 vs. 57.9; difference -1.7; 95% CI, -10.5 to 7.3) GA, Figure 3. The average Black P3 participant watched 30% of the 51 videos, compared to the overall P3 group mean of 55% of the videos watched.<sup>4</sup>

At study completion, more P3 participants reported discussing preterm birth with their partner (100% P3 vs. 57% control; difference 43 percentage points; 95% CI, 6 to 80 percentage points). Though not significantly different than the control group, more participants in the P3 group reported sharing preterm birth information with other family and friends (55% vs. 43%; difference 12 percentage points; 95% CI, -35 to 59 percentage points).

Of the P3 participants, 100% reported the P3 education provided more preterm birth information than their physician.

#### 4. Discussion and Conclusion

**4.1 Discussion:** In this subgroup analysis of the Black women who participated in a RCT of the P3 program, those in the P3 group had better knowledge of preterm birth than those in the control group, without experiencing increased anxiety. Despite a limited sample, pregnant women in the P3 group were more prepared to make decisions regarding giving birth at a risk-appropriate birth hospital. Black women in the P3 group also reported having more discussions about preterm birth issues with their partners than those in the control group, and they all reported the program gave more preterm birth information than their doctor.

The racial disparity in preterm birth rates is largely due to downstream effects of structural racism.<sup>18</sup> Black women face more barriers to clinic-based prenatal education<sup>19</sup> because of issues such as transportation and childcare.<sup>20, 21</sup> With further study, the P3 program may provide an option of circumnavigating these barriers to deliver preventive preterm birth education to those at higher risk of delivering preterm.<sup>5</sup>

This study was limited by its post-hoc analysis of a small sample and the low participation rate often seen among Black patients in clinical trials.<sup>22</sup> While the trial's sample matched the clinic's demographics, the lower rates of engagement merit further exploration. Future studies to investigate the barriers and facilitators of P3 program usage will ensure greater acceptability and better tailor the program to Black families' needs, as well as determine clinical outcomes.

**4.2 Innovation:** While smartphone-based prenatal education is widely used,<sup>23</sup> providing preterm birth information through this modality is a new concept. This is reflected in the title given by Dr. Waldemar Carlo, a senior physician-scientist of Neonatal Research Network, in his *JAMA Pediatrics* editorial about the P3 program: “Preterm Prenatal Education—A Novel Approach.”<sup>24</sup> The P3 program offers a unique approach to prepare patients with high-risk pregnancies with information needed to improve outcomes. By offering prenatal preterm birth education to Black women through our smartphone-based platform, the P3 program overcomes transportation, childcare, and time off work-related barriers of traditional education for a group of patients particularly burdened by the clinic-based model. We are not the first to explore these potential benefits of mHealth for Black pregnancies.<sup>7-9</sup> However, unlike the programs that include only normal pregnancies, the P3 program focuses on high-risk pregnancies and is the first mHealth intervention to provide education on preterm birth.

**4.3 Conclusions:** Even with suboptimal rates of engagement, the P3 program appears to be an effective method of providing preterm birth education to Black pregnant women. With further study, the inexpensive and easily scalable program could potentially benefit thousands of Black families in the US every year.

1. Callaghan WM, MacDorman MF, Rasmussen SA, Qin C, Lackritz EM. The contribution of preterm birth to infant mortality rates in the United States. *Pediatrics*. 2006;118(4):1566-73.
2. Mehrotra A, Lagatta J, Simpson P, Kim UO, Nugent M, Basir M. Variations among US hospitals in counseling practices regarding prematurely born infants. *J Perinatol*. 2013;33(7):509-13.
3. Roberts JM, King TL, Barton JR, Beck S, Bernstein IM, Buck TE, Forgues-Lackie MA, Facco FL, Gernand AD, Graves CR, Jeyabalan A, Hauspurg A, Manuck TA, Myers JE, Powell TM, Sutton EF, Tinker E, Tsigas E, Myatt L. Care plan for individuals at risk for preeclampsia: Shared approach to education, strategies for prevention, surveillance, and follow-up. *Am J Obstet Gynecol*. 2023;229(3):193-213. Epub 20230427. doi: 10.1016/j.ajog.2023.04.023. PubMed PMID: 37120055.
4. Flynn KE, McDonnell SM, Brazauskas R, Ahamed SI, McIntosh JJ, Pitt MB, Pizur-Barnekow K, Kim UO, Kruper A, Leuthner SR, Basir MA. Smartphone-based video antenatal preterm birth education: The Premie Prep for Parents randomized clinical trial. *JAMA Pediatr*. 2023;177(9):921-9. Epub 20230731. doi: 10.1001/jamapediatrics.2023.1586. PubMed PMID: 37523163; PMCID: PMC10481234.
5. Osterman MJK, Hamilton BE, Martin JA, Driscoll AK, Valenzuela CP. Births: Final Data for 2021. *Natl Vital Stat Rep*. 2023;72(1):1-53. PubMed PMID: 36723449.
6. Kogan MD, Kotelchuck M, Alexander GR, Johnson WE. Racial disparities in reported prenatal care advice from health care providers. *Am J Public Health*. 1994;84(1):82-8. doi: 10.2105/ajph.84.1.82. PubMed PMID: 8279618; PMCID: PMC1614898.
7. Foster J, Miller L, Isbell S, Shields T, Worthy N, Dunlop AL. mHealth to promote pregnancy and interconception health among African-American women at risk for adverse birth outcomes: a pilot study. *Mhealth*. 2015;1:20. Epub 20151215. doi: 10.3978/j.issn.2306-9740.2015.12.01. PubMed PMID: 28293578; PMCID: PMC5344147.
8. Hernandez-Green N, Davis MV, Farinu O, Hernandez-Spalding K, Lewis K, Beshara MS, Francis S, Baker LJ, Byrd S, Parker A, Chandler R. Using mHealth to reduce disparities in Black maternal health: Perspectives from Black rural postpartum mothers. *Womens Health (Lond)*. 2024;20:17455057241239769. doi: 10.1177/17455057241239769. PubMed PMID: 38773870; PMCID: PMC11113071.
9. Herring SJ, Cruice JF, Bennett GG, Darden N, Wallen JJ, Rose MZ, Davey A, Foster GD. Intervening during and after pregnancy to prevent weight retention among African American women. *Prev Med Rep*. 2017;7:119-23. Epub 20170601. doi: 10.1016/j.pmedr.2017.05.015. PubMed PMID: 28660118; PMCID: PMC5479961.
10. Harris PA, Taylor R, Thielke R, Payne J, Gonzalez N, Conde JG. Research electronic data capture (REDCap)--a metadata-driven methodology and workflow process for providing translational research informatics support. *J Biomed Inform*. 2009;42(2):377-81. Epub 2008/10/22. doi: 10.1016/j.jbi.2008.08.010. PubMed PMID: 18929686; PMCID: PMC2700030.
11. Balza JS, Cusatis R, McDonnell SM, Basir MA, Flynn KE. Effective questionnaire design: How to use cognitive interviews to refine questionnaire items. *J Neonatal Perinatal Med*. 2022(Preprint):1-5.
12. Rau NM, Basir MA, Flynn KE. Parental understanding of crucial medical jargon used in prenatal prematurity counseling. *BMC Med Inform Decis Mak*. 2020;20(1):169. Epub 2020/07/24. doi: 10.1186/s12911-020-01188-w. PubMed PMID: 32698793; PMCID: PMC7376726.
13. Bennett C, Graham ID, Kristjansson E, Kearing SA, Clay KF, O'Connor AM. Validation of a preparation for decision making scale. *Patient Educ Couns*. 2010;78(1):130-3. Epub 2009/06/30. doi: 10.1016/j.pec.2009.05.012. PubMed PMID: 19560303.
14. Flens G, Smits N, Terwee CB, Dekker J, Huijbrechts I, Spinhoven P, de Beurs E. Development of a Computerized Adaptive Test for Anxiety Based on the Dutch-Flemish Version of the PROMIS Item Bank. *Assessment*. 2019;26(7):1362-74. Epub 2017/12/13. doi: 10.1177/1073191117746742. PubMed PMID: 29231048.



15. Allen VC, Jr., Lachance C, Rios-Ellis B, Kaphingst KA. Issues in the Assessment of "Race" among Latinos: Implications for Research and Policy. *Hisp J Behav Sci.* 2011;33(4):411-24. doi: 10.1177/0739986311422880. PubMed PMID: 23239903; PMCID: PMC3519364.
16. Hitlin S, Brown JS, Elder Jr GH. Measuring Latinos: Racial vs. ethnic classification and self-understandings. *Soc Forces.* 2007;86(2):587-611.
17. Galdámez M, Gomez M, Perez R, Renteria Salome L, Silver J, Dominguez-Villegas R, Zong J, Lopez N. Centering Black Latinidad: A Profile of the U.S. Afro-Latinx Population and Complex Inequalities: UCLA Latino Policy & Politics Institute; 2023 [cited 2024]. Available from: <https://latino.ucla.edu/research/centering-black-latinidad/>.
18. Braveman P, Dominguez TP, Burke W, Dolan SM, Stevenson DK, Jackson FM, Collins JW, Jr., Driscoll DA, Haley T, Acker J, Shaw GM, McCabe ERB, Hay WW, Jr., Thornburg K, Acevedo-Garcia D, Cordero JF, Wise PH, Legaz G, Rashied-Henry K, Frost J, Verbiest S, Waddell L. Explaining the Black-White Disparity in Preterm Birth: A Consensus Statement From a Multi-Disciplinary Scientific Work Group Convened by the March of Dimes. *Front Reprod Health.* 2021;3:684207. Epub 20210902. doi: 10.3389/frph.2021.684207. PubMed PMID: 36303973; PMCID: PMC9580804.
19. Fryer K, Munoz MC, Rahangdale L, Stuebe AM. Multiparous Black and Latinx Women Face More Barriers to Prenatal Care than White Women. *J Racial Ethn Health Disparities.* 2021;8(1):80-7. Epub 20200424. doi: 10.1007/s40615-020-00759-x. PubMed PMID: 32333378.
20. Mazul MC, Salm Ward TC, Ngui EM. Anatomy of Good Prenatal Care: Perspectives of Low Income African-American Women on Barriers and Facilitators to Prenatal Care. *J Racial Ethn Health Disparities.* 2017;4(1):79-86. Epub 20160128. doi: 10.1007/s40615-015-0204-x. PubMed PMID: 26823064.
21. Wolf ER, Donahue E, Sabo RT, Nelson BB, Krist AH. Barriers to Attendance of Prenatal and Well-Child Visits. *Acad Pediatr.* 2021;21(6):955-60. Epub 20201203. doi: 10.1016/j.acap.2020.11.025. PubMed PMID: 33279734; PMCID: PMC8172669.
22. Rivers D, August EM, Sehovic I, Lee Green B, Quinn GP. A systematic review of the factors influencing African Americans' participation in cancer clinical trials. *Contemp Clin Trials.* 2013;35(2):13-32. Epub 20130401. doi: 10.1016/j.cct.2013.03.007. PubMed PMID: 23557729.
23. Lazarevic N, Pizzuti C, Rosic G, Boehm C, Williams K, Caillaud C. A mixed-methods study exploring women's perceptions and recommendations for a pregnancy app with monitoring tools. *NPJ Digit Med.* 2023;6(1):50. Epub 20230324. doi: 10.1038/s41746-023-00792-0. PubMed PMID: 36964179; PMCID: PMC10036977.
24. Schuyler AQ, Carlo WA. Preterm Prenatal Education-A Novel Approach. *JAMA Pediatr.* 2023. Epub 20230731. doi: 10.1001/jamapediatrics.2023.2569. PubMed PMID: 37523169.

Table 1. Demographics of Black participants.

| <b>Participant characteristics, No. (%)</b>     | <b>Total<br/>n=26</b> | <b>P3<br/>n=14</b> | <b>Control<br/>n=12</b> |
|-------------------------------------------------|-----------------------|--------------------|-------------------------|
| <b>Race</b>                                     |                       |                    |                         |
| Identified race as Black only                   | 23 (88)               | 11 (80)            | 12 (100)                |
| Identified race as Black and white <sup>a</sup> | 3 (12)                | 3 (20)             | 0                       |
| <b>Education</b>                                |                       |                    |                         |
| ≤ High school diploma                           | 12 (46)               | 5 (36)             | 7 (58)                  |
| Some college                                    | 10 (38)               | 6 (43)             | 4 (33)                  |
| 4-year degree                                   | 1 (4)                 | 0                  | 1 (8)                   |
| Graduate degree                                 | 3 (12)                | 3 (21)             | 0                       |
| <b>Marital status</b>                           |                       |                    |                         |
| Married                                         | 5 (19)                | 5 (36)             | 0                       |
| Not married                                     | 21 (81)               | 9 (64)             | 12 (100)                |
| <b>Living situation</b>                         |                       |                    |                         |
| Living with partner                             | 17 (65)               | 10 (71)            | 7 (58)                  |
| Not living with partner                         | 9 (35)                | 4 (29)             | 5 (42)                  |
| <b>Preterm birth risk factor<sup>b</sup></b>    |                       |                    |                         |
| Pregestational diabetes                         | 3 (12)                | 1 (7)              | 2 (17)                  |
| Chronic hypertension                            | 10 (38)               | 2 (14)             | 8 (67)                  |
| History of preeclampsia                         | 2 (8)                 | 1 (7)              | 1 (8)                   |
| History of preterm birth                        | 13 (50)               | 9 (64)             | 4 (33)                  |
| Short cervix                                    | 1 (4)                 | 0                  | 1 (8)                   |
| Multifetal gestation                            | 5 (19)                | 3 (21)             | 2 (17)                  |

<sup>a</sup> Participants could self-report more than one race from National Institutes of Health prespecified racial categories; in our sample, the only other race identified by Black participants was white.

<sup>b</sup> Preterm birth risk factor percentages may not add up to 100% as patients could have more than one risk factor.

Figure 1. Knowledge scores of Black participants by study group.

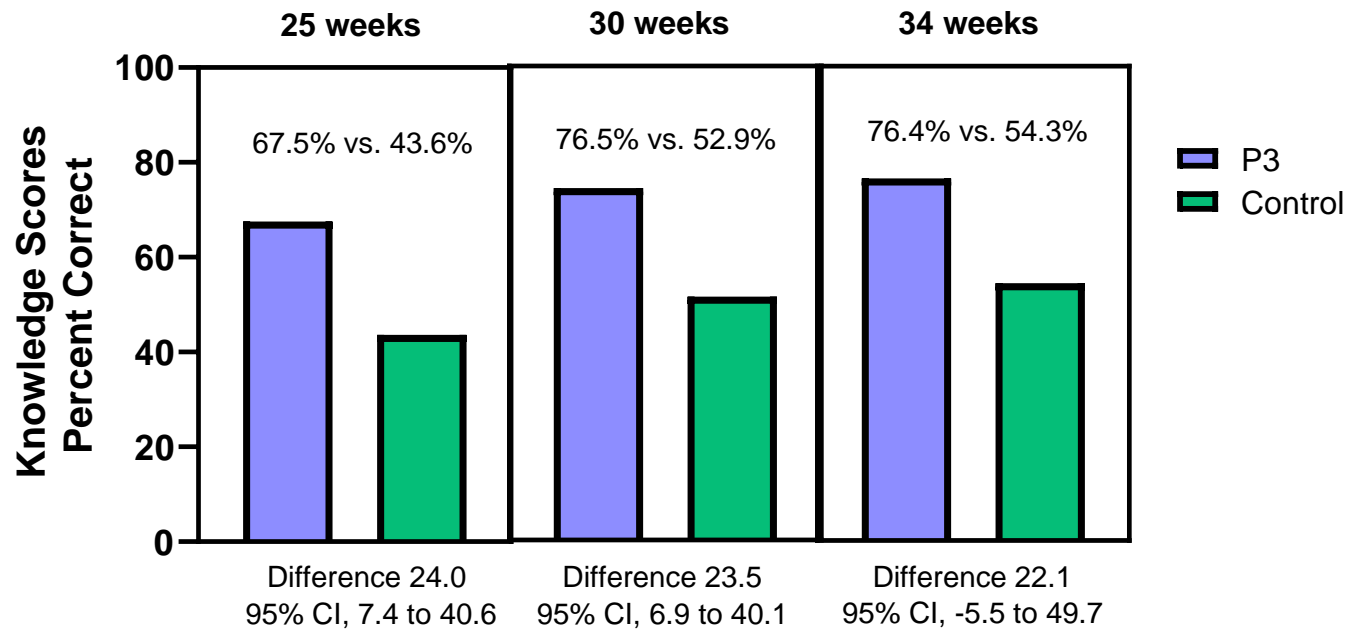

Figure 2. Preparation for Decision Making Scale scores of Black participants by study group.

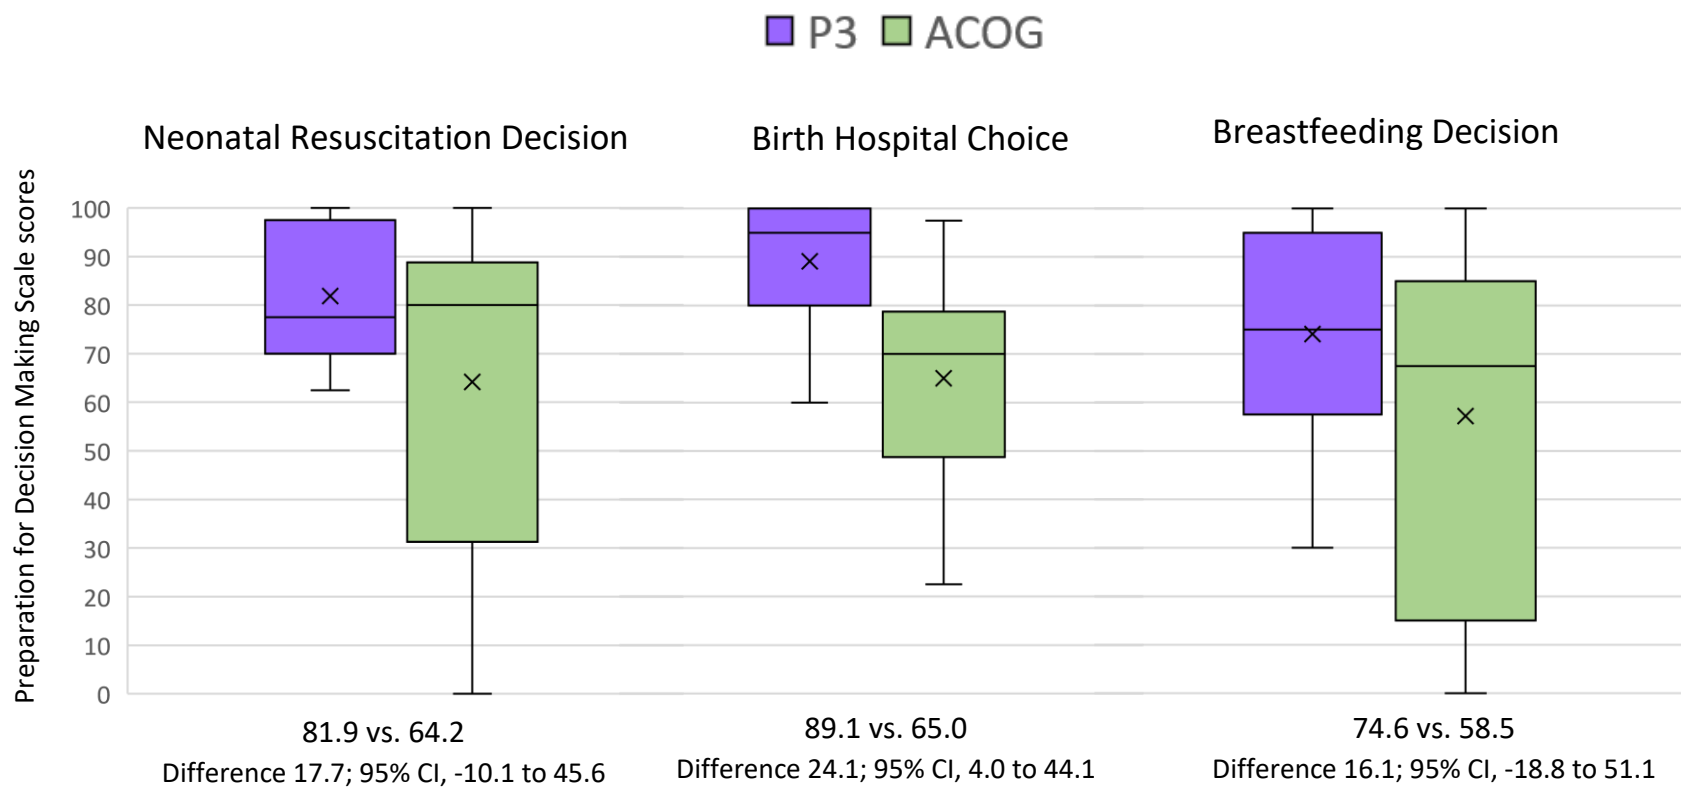

Figure 3. PROMIS Anxiety scale t-scores of Black participants by study group.

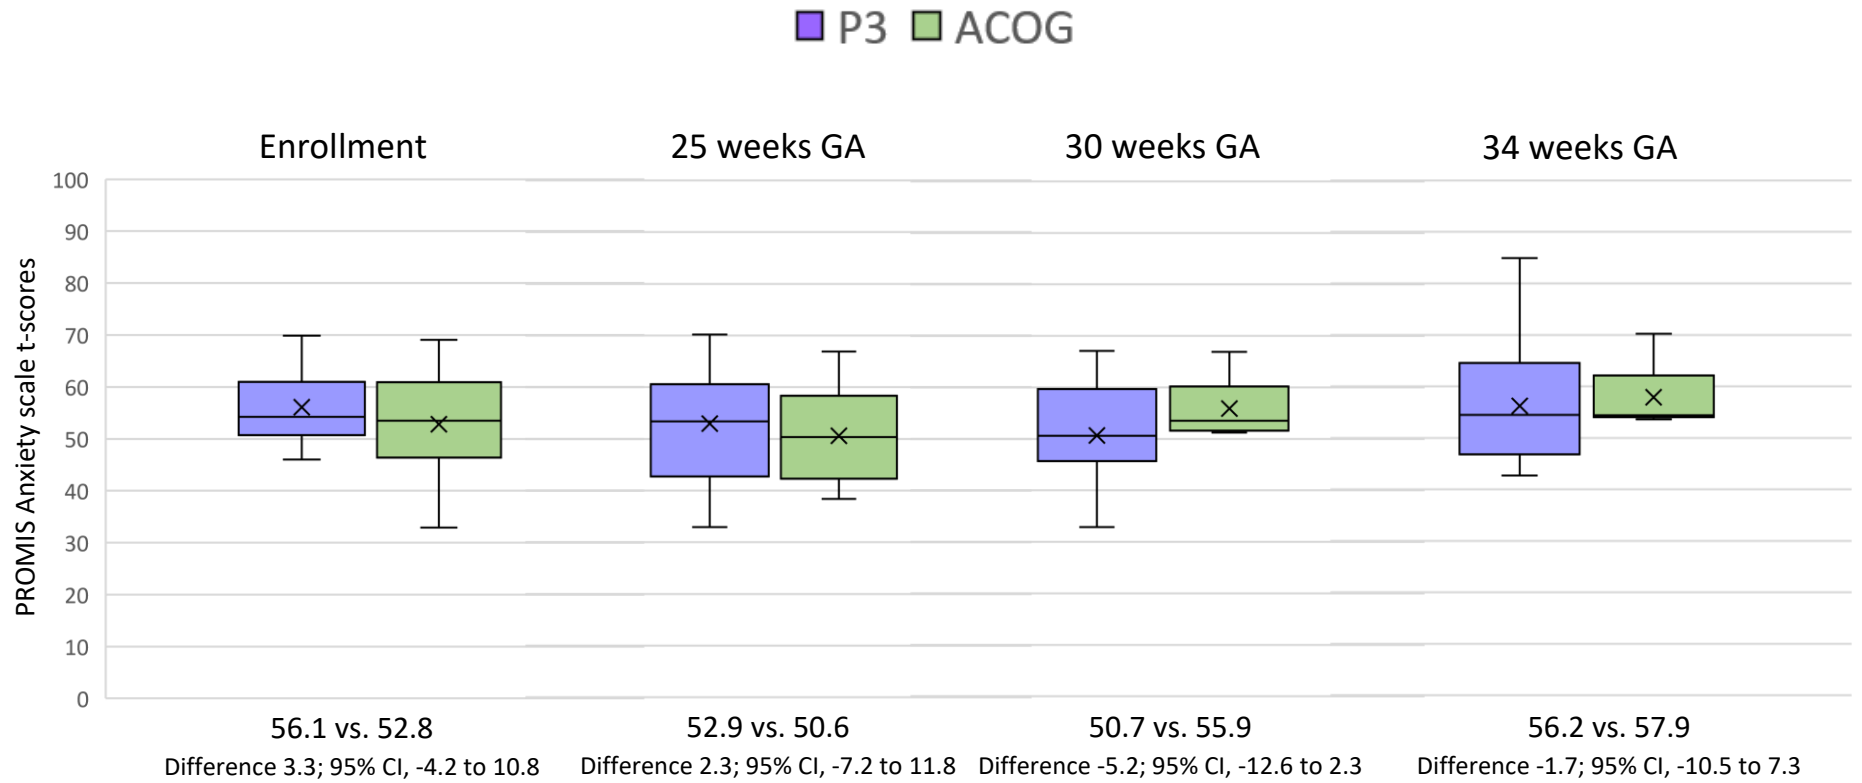

Source: https://medrxiv.org/content/10.1101/2024.08.28.24312637v1.full.pdf
